# Supplementary material for: Demographics, Cutaneous Manifestations, and Comorbidities Associated with Progressive Cutaneous Sarcoidosis: A Retrospective Cohort Study
Source: MDPI journal article supplement (doi:10.3390/medicines10100057), 2023-10-12
Supplement: s1 [file s1]

**Table S1.** Associations of Lupus Pernio and Progressive Sarcoidosis Stratified by Race.

| Cutaneous and Racial Category | Remission/Stable<br>( <i>n</i> = 133, %) | Progressive<br>( <i>n</i> = 107, %) | Adjusted<br>Odds Ratio <sup>1</sup> | 95% Confidence<br>Intervals | <i>p</i> -Value <sup>2</sup> |
|-------------------------------|------------------------------------------|-------------------------------------|-------------------------------------|-----------------------------|------------------------------|
| Black, Lupus Pernio           | 11 (8)                                   | 33 (31)                             | 4.07                                | 1.83–9.02                   | <b>0.002</b>                 |
| Black No Lupus Pernio         | 77 (58)                                  | 62 (58)                             |                                     |                             |                              |
| White, Lupus Pernio           | 1 (1)                                    | 4 (4)                               | 17.5                                | 1.55–196.3                  | <b>0.021</b>                 |
| White, No Lupus Pernio        | 44 (33)                                  | 8 (7)                               |                                     |                             |                              |

<sup>1</sup> Controlled for age at diagnosis, sex, and smoking status (never, previous, current). <sup>2</sup>  $\alpha = 0.05$ , *p* values adjusted using the Benjamini-Hochberg method.

**Table S2.** Sociodemographics and Comorbidities Stratified by Sex.

| Total (N)                             | Full Cohort    |                   |                       | Progressive Cohort |              |                       |
|---------------------------------------|----------------|-------------------|-----------------------|--------------------|--------------|-----------------------|
|                                       | 72<br>Male (%) | 168<br>Female (%) | <i>p</i> <sup>1</sup> | 33<br>Male         | 74<br>Female | <i>p</i> <sup>1</sup> |
| Black                                 | 45 (67)        | 138 (84)          |                       | 22 (69)            | 68 (93)      |                       |
| White                                 | 22 (33)        | 25 (15)           | 0.003                 | 10 (31)            | 5 (7)        | 0.001                 |
| Age (years), mean (SD)                | 43.5 (11.2)    | 43.7 (12)         | 0.8648                | 41.1 (8.9)         | 39.3 (9.9)   | 0.3968                |
| Follow-up time (years), mean (SD)     | 9.9 (8.1)      | 13.6 (10.9)       | 0.0123                | 11.3 (8.6)         | 17.4 (11.4)  | 0.006                 |
| Specific                              | 67 (93)        | 157 (93)          | 0.656                 | 33 (100)           | 74 (100)     | 0.519                 |
| Non-specific                          | 12 (17)        | 31 (18)           | 0.803                 | 4 (12)             | 10 (14)      | 0.936                 |
| Papular                               | 22 (31)        | 60 (36)           | 0.698                 | 10 (30)            | 23 (31)      | 0.936                 |
| Nodular                               | 24 (33)        | 64 (38)           | 0.698                 | 11 (33)            | 29 (39)      | 0.936                 |
| Subcutaneous                          | 16 (22)        | 28 (17)           | 0.656                 | 7 (21)             | 14 (19)      | 0.936                 |
| Macular                               | 13 (18)        | 29 (17)           | 0.822                 | 10 (30)            | 13 (18)      | 0.519                 |
| Plaque                                | 27 (38)        | 57 (34)           | 0.735                 | 14 (42)            | 21 (29)      | 0.519                 |
| Lupus Pernio                          | 13 (18)        | 35 (21)           | 0.735                 | 8 (24)             | 21 (28)      | 0.936                 |
| Ulcerative                            | 1 (1)          | 7 (4)             | 0.656                 | 0 (0)              | 4 (5)        | 0.519                 |
| Erythema Nodosum                      | 3 (4)          | 14 (8.3)          | 0.656                 | 2 (6)              | 5 (7)        | 0.936                 |
| Pruritis                              | 9 (13)         | 12 (7)            | 0.656                 | 3 (9)              | 4 (5)        | 0.936                 |
| Clubbing                              | 0 (0)          | 2 (1)             | 0.656                 | 0 (0)              | 1 (1)        | 0.936                 |
| Lofgren's                             | 1 (1)          | 0 (0)             | 0.656                 | 0                  | 0            |                       |
| Medical Allergy                       | 41 (57)        | 118 (70)          | 0.356                 | 20 (61)            | 59 (80)      | 0.479                 |
| Food Allergy                          | 13 (18)        | 44 (26)           | 0.481                 | 6 (18)             | 22 (30)      | 0.479                 |
| Asthma                                | 19 (26)        | 29 (17)           | 0.385                 | 10 (30)            | 14 (19)      | 0.479                 |
| Inflammatory Arthritis                | 4 (6)          | 19 (11)           | 0.481                 | 2 (6)              | 12 (16)      | 0.479                 |
| Osteoarthritis                        | 1 (1)          | 6 (4)             | 0.667                 | 0 (0)              | 3 (4)        | 0.479                 |
| Crohn's Disease                       | 0 (0)          | 2 (1)             | 0.667                 | 0 (0)              | 1 (1)        | 0.736                 |
| Sicca Syndrome                        | 1 (1)          | 3 (2)             | 0.909                 | 1 (3)              | 2 (3)        | 0.952                 |
| Osteoporosis                          | 1 (1)          | 5 (30)            | 0.811                 | 1 (3)              | 2 (3)        | 0.479                 |
| Chronic Kidney Disease                | 6 (8)          | 11 (7)            | 0.877                 | 4 (12)             | 5 (7)        | 0.602                 |
| Sleep Apnea                           | 13 (18)        | 28 (17)           | 0.909                 | 6 (18)             | 15 (20)      | 0.927                 |
| Gastroesophageal Reflux Disease       | 14 (19)        | 51 (30)           | 0.356                 | 6 (18)             | 22 (30)      | 0.479                 |
| Chronic Heart Failure                 | 6 (8)          | 16 (10)           | 0.909                 | 4 (12)             | 8 (11)       | 0.927                 |
| Depression                            | 10 (14)        | 23 (14)           | 1                     | 7 (21)             | 9 (12)       | 0.479                 |
| Anxiety                               | 7 (10)         | 18 (11)           | 0.909                 | 3 (9)              | 7 (9)        | 0.952                 |
| Systemic Lupus Erythematosus          | 1 (1)          | 4 (2)             | 0.877                 | 0 (0)              | 3 (4)        | 0.479                 |
| Type II Diabetes Mellitus             | 15 (21)        | 55 (33)           | 0.356                 | 8 (24)             | 21 (28)      | 0.836                 |
| Chronic Obstructive Pulmonary Disease | 2 (3)          | 10 (6)            | 0.667                 | 1 (3)              | 7 (9)        | 0.479                 |
| Dyslipidemia                          | 18 (25)        | 33 (20)           | 0.667                 | 6 (18)             | 16 (22)      | 0.836                 |

|                            |         |         |       |        |         |       |
|----------------------------|---------|---------|-------|--------|---------|-------|
| Autoimmune Thyroid Disease | 5 (7)   | 26 (15) | 0.356 | 5 (15) | 13 (18) | 0.479 |
| Malignancy                 | 6 (8)   | 14 (8)  | 1     | 2 (6)  | 8 (11)  | 0.479 |
| Other Autoimmune Condition | 3 (4)   | 5 (3)   | 0.667 | 2 (6)  | 3 (4)   | 0.836 |
| Any Autoimmune Condition   | 11 (15) | 45 (27) | 0.356 | 6 (18) | 25 (34) | 0.479 |

---

<sup>1</sup>  $\alpha = 0.05$ ,  $p$  values adjusted using the Benjamini-Hochberg method.
